# Supplementary material for: Pulmonary Vascular Platform Models the Effects of Flow and Pressure on Endothelial Dysfunction in BMPR2 Associated Pulmonary Arterial Hypertension
Source: PubMed Central journal article supplement (PMC6164056; doi:10.3390/ijms19092561), 2018-08-29
Supplement: ijms-19-02561-s001.pdf [file ijms-19-02561-s001.pdf]

**Supplement:**

**Supplement 1:** Tables of the Statistically Overrepresented Gene Ontology Groups (Congruent and Incongruent are below):

Statistically Overrepresented Gene Ontology Groups (Incongruent)

| <b>Description</b>                        | <b># Genes</b> | <b>P-Value</b> |
|-------------------------------------------|----------------|----------------|
| activation of MAPKKK activity             | 3              | 1.40E-05       |
| response to nutrient levels               | 10             | 5.09E-05       |
| response to external stimulus             | 24             | 8.87E-05       |
| single organism cell adhesion             | 12             | 0.000675186    |
| Notch signaling pathway                   | 5              | 0.002555792    |
| small molecule metabolic process          | 18             | 0.006611771    |
| regulation of blood circulation           | 5              | 0.006698247    |
| reactive oxygen species metabolic process | 5              | 0.007099366    |
| morphogenesis of a branching structure    | 5              | 0.007804783    |
| apoptotic process                         | 17             | 0.008529415    |
| oxidation-reduction process               | 12             | 0.009155532    |

Statistically Overrepresented Gene Ontology Groups (Congruent)

| <b>Description</b>                              | <b># Genes</b> | <b>P-Value</b> |
|-------------------------------------------------|----------------|----------------|
| circulatory system development                  | 29             | 2.52E-09       |
| negative regulation of biosynthetic process     | 36             | 2.75E-09       |
| tissue development                              | 40             | 6.47E-09       |
| response to mechanical stimulus                 | 13             | 1.36E-08       |
| response to endogenous stimulus                 | 34             | 2.67E-08       |
| response to external stimulus                   | 39             | 2.59E-07       |
| regulation of intracellular signal transduction | 30             | 3.93E-06       |
| MAPK cascade                                    | 19             | 5.44E-06       |
| cellular response to interleukin-1              | 7              | 1.16E-05       |
| cell proliferation                              | 33             | 1.48E-05       |
| cell death                                      | 33             | 2.14E-05       |

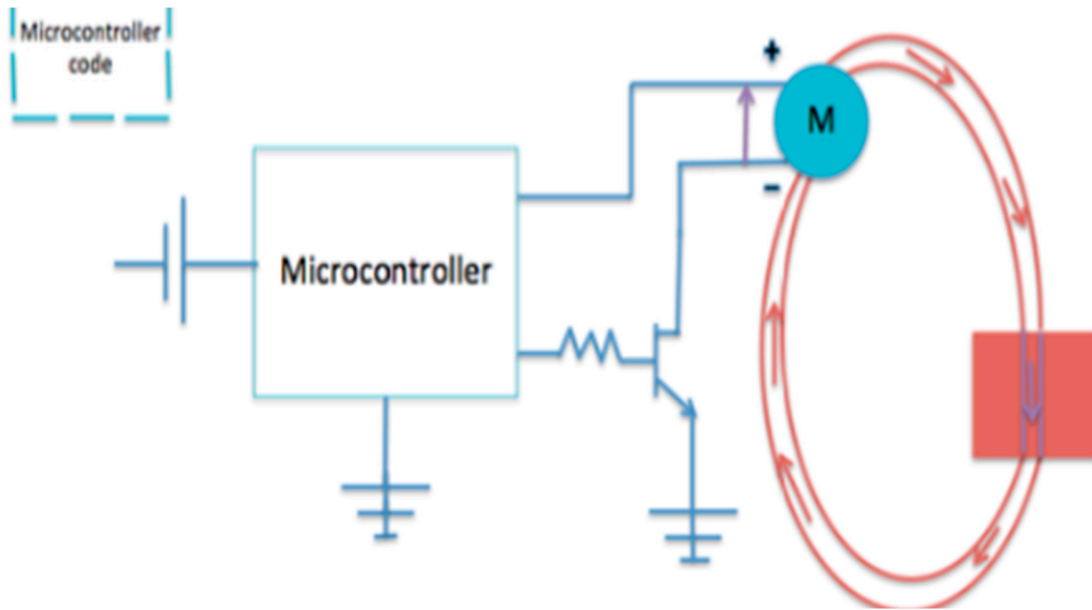

**Supplement 2:** Overview schematic of platform circuit and media circulation.

In **Supplement 3** an annotation of the PDMS mold and hydrogel is depicted. Below in **Supplement 4**, an image of the petri dish platform that houses the seeded and perfused devices is depicted.

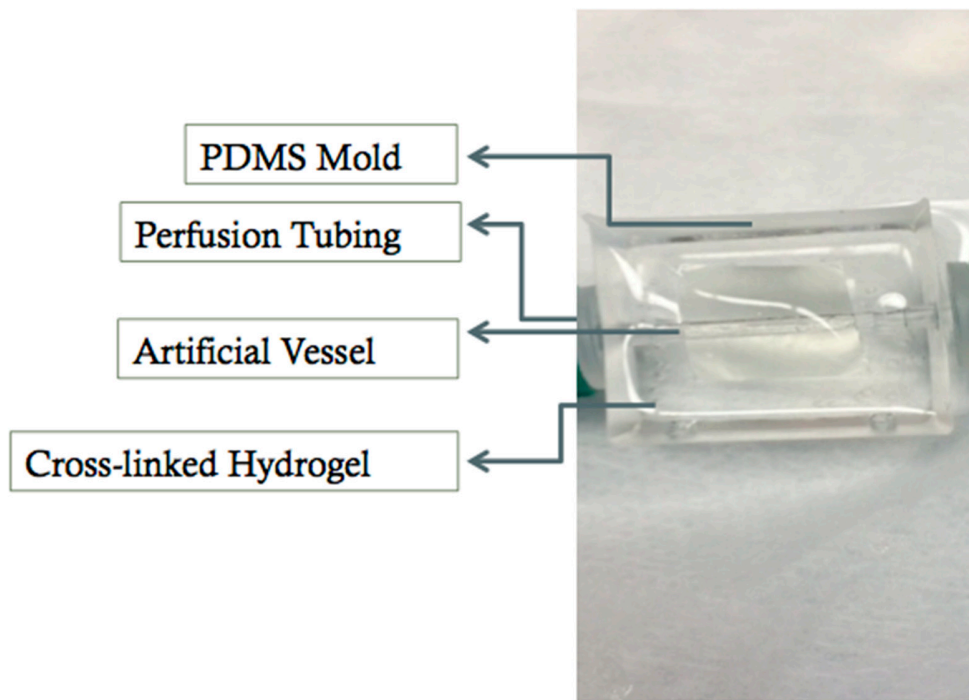

---

**Supplement 3:** Description of parts of the PDMS mold and hydrogel construct.

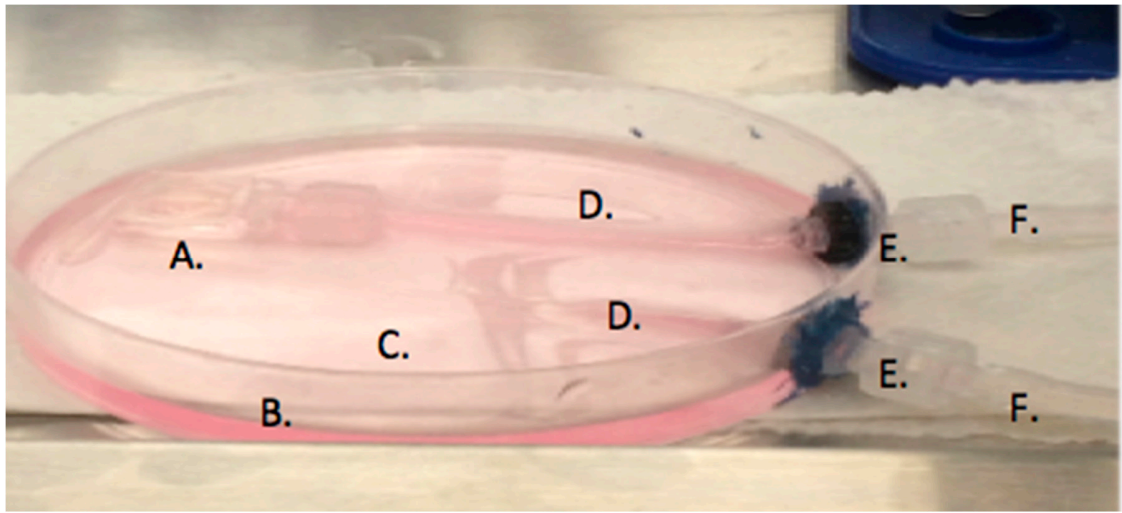

**Supplement 4:** Image of petri dish showing perfusion tubing, PDMS/hydrogel construct, and assembled platform. A) PDMS/Hydrogel device, B) Petri dish housing, C) Media reservoir, D) In/outflow tubing, E) Adapter conduits adhered to dish, F) Peristaltic pump perfusion tubing. Note: actual device perfusion and experimentation occurs within a 37C incubator

Below are the codes used to 1) program the Arduino microcontroller used for channel perfusion and regulation of oscillatory flow and 2) calculate permeabilities of cells from intensity values taken from ImageJ.

Arduino Code:

```
int motorPin = A1;
int blinkPin = 13;

int pumptime =100
// how long pump is on
int waittime =1000; // how long pump is off

void setup() {
  // put your setup code here, to run once:
  pinMode(motorPin, OUTPUT);
  pinMode(blinkPin, OUTPUT);
}

void loop() {
  // put your main code here, to run repeatedly:
  digitalWrite(motorPin, HIGH);
  digitalWrite(blinkPin, HIGH);
  delay(pumptime);
  digitalWrite(motorPin, LOW);
  digitalWrite(blinkPin, LOW);
  delay(waittime);
}
```

Matlab Code:

```
%% Calculate permeability from confocal imaging datasets
```

```
Dgelatin=20.9 %From FRAP Data 10k=12.6, 3k=20.9
```

```
Distance_microns = 1120 %distance from channel edge to gel edge
```

```
%%Import measurements from fiji macro
```

```
Iedge = xlsread('C:\path\ GelBG.csv',1,'B2:B241');%%Average Intensity at no-flux region
```

```
Channel_Io = xlsread('C:\pathChannelBG.csv',1,'B2:B241'); %%Intensity within channel
```

```
Igel= xlsread('C:\path\GelNearChannelBG.csv','B2:B241');%%Average intensity of gel
```

```
%% Convert slice/frame number to time interval
```

```
Slice = xlsread('C:\path\Profile.csv','Profile','C1:IH1');
```

```
Time_minute = Slice*.5;
```

```
Time_second = Time_minute*60;
```

```
%%Calculating C for each timepoint
```

```
C_numerator=Iedge-Channel_Io;
```

```
C_denominator = Igel-Channel_Io;
```

```
C=C_numerator./C_denominator;
```

```
%% Graphing logC versus time
```

```
x = Time_second;
```

```
y = C;
```

```
plot=semilogy(x,y);
```

```
%%Fit logC versus time to extract Lambda (slope)
```

```
curvefit = fitlm(x,y,'poly1');
```

```
coeff=curvefit.Coefficients.Estimate;
```

```
Rvalue=curvefit.Rsquared.Ordinary;
```

```
output = xlswrite('C:\path\curvefit.xlsx', coeff,1);
```

```
%Use Lambda to calculate K (permeability) in microns/second
```

```
Lamda = xlsread('C:\path\curvefit.xlsx',1,'A2:A2');
```

```
K=(Dgelatin/Distance_microns)*(Lamda*tan(Lamda));
```

```
K_cm = K*10000; %% conversion to cm/s
```

```
outputValue = {'K cm/s';'Lambda';'Rsquared'}
```

```
values=[K_cm; K;Lamda;Rvalue];
```

```
result= table(outputValue, values);
```

```
%Save results in excel file
```

```
writetable(result,'C:\path\Results.xlsx','Sheet',1,'Range','A1:B3')
```

Below are the tables of the genes used to generate the heat map.

**Supplement Table 1: Congruent Genes used in the heat map**

| Gene Symbol    | WT static | WT static 2 | WT perfused | WT perfused 2 | R899X static | R899X static 2 | R899X perfused 2 | R899X perfused |
|----------------|-----------|-------------|-------------|---------------|--------------|----------------|------------------|----------------|
| 1010001N08Rik  | 1.5       | 1.5         | 1.3         | 0.8           | 2.0          | 1.9            | 1.5              | 1.1            |
| 1700123I01Rik  | 1.1       | 1.5         | 0.7         | 0.7           | 1.8          | 1.1            | 1.4              | 0.6            |
| 2610044O15Rik8 | 3.6       | 3.7         | 3.7         | 4.0           | 2.8          | 2.9            | 3.4              | 3.3            |
| 2900097C17Rik  | 1.1       | 1.4         | 1.9         | 2.3           | 3.4          | 3.8            | 4.3              | 3.6            |
| 3110001I22Rik  | 1.8       | 2.0         | 2.5         | 2.3           | 1.6          | 1.5            | 2.3              | 2.9            |
| 4930581F22Rik  | 0.3       | 0.8         | 0.2         | -0.6          | 0.4          | 0.7            | 0.1              | 0.0            |
| 5830415F09Rik  | 3.1       | 3.2         | 4.1         | 3.7           | 2.4          | 2.9            | 3.6              | 3.4            |
| 9330179D12Rik  | 0.2       | -           | 0.3         | 0.3           | -            | -              | 0.5              | 0.2            |
| A130014A01Rik  | 1.4       | 1.7         | 0.9         | 1.2           | 0.8          | 0.7            | -0.1             | -0.1           |
| Adamts1        | 6.1       | 5.5         | 5.6         | 7.5           | 5.7          | 6.0            | 8.0              | 7.7            |
| Ankrd1         | 5.4       | 5.9         | 6.6         | 7.0           | 5.1          | 5.2            | 6.3              | 7.7            |
| Anks1b         | 1.1       | 0.6         | -1.3        | -0.6          | 1.2          | 0.8            | 0.1              | 0.6            |
| Ankzf1         | 4.1       | 3.6         | 3.4         | 3.7           | 4.2          | 4.1            | 3.8              | 3.5            |
| Apoe           | 0.2       | -           | -0.4        | -0.4          | 4.9          | 3.9            | 3.8              | 3.5            |
| Arhgef4        | 0.8       | 0.9         | -0.6        | 0.1           | 1.6          | 1.4            | 1.1              | 0.8            |
| Arid5a         | 5.4       | 4.9         | 5.7         | 5.9           | 6.1          | 5.7            | 6.6              | 6.8            |
| Armc5          | 3.8       | 4.0         | 4.2         | 4.2           | 3.7          | 4.2            | 4.3              | 4.6            |
| Arrdc3         | 3.4       | 3.9         | 4.4         | 4.5           | 3.7          | 4.3            | 4.9              | 3.8            |
| Atp5sl         | 4.2       | 4.1         | 3.7         | 3.7           | 3.9          | 3.8            | 3.6              | 3.8            |
| Atxn7l2        | 2.5       | 2.3         | 2.9         | 3.1           | 2.4          | 2.4            | 2.9              | 2.5            |
| Bbs10          | 2.2       | 2.0         | 1.1         | 1.2           | 2.2          | 2.3            | 1.5              | 0.5            |
| Bhlhe40        | 7.0       | 7.2         | 8.2         | 8.2           | 6.8          | 6.8            | 8.2              | 7.5            |
| Bora           | 4.6       | 4.6         | 5.0         | 5.3           | 4.9          | 4.6            | 5.1              | 5.2            |
| Brd1           | 4.5       | 4.6         | 3.1         | 3.2           | 2.7          | 4.3            | 3.0              | 2.5            |
| Btg2           | 5.2       | 5.0         | 6.7         | 6.5           | 6.6          | 4.5            | 8.8              | 8.3            |
| C1qtnf6        | 3.5       | 3.5         | 2.3         | 2.8           | 2.8          | 3.7            | 3.3              | 2.1            |
| Cacnb3         | 3.8       | 3.7         | 3.1         | 3.3           | 3.4          | 4.1            | 3.6              | 3.4            |
| Ccdc64         | 3.9       | 3.7         | 3.4         | 3.3           | 3.5          | 3.6            | 2.9              | 3.0            |
| Ccsap          | 3.5       | 3.5         | 2.9         | 2.7           | 3.5          | 3.2            | 2.8              | 2.9            |
| Cdc34-ps       | 1.2       | 1.4         | 0.8         | 0.9           | 1.2          | 0.8            | 0.5              | 0.8            |

|               |     |     |      |      |     |     |      |      |
|---------------|-----|-----|------|------|-----|-----|------|------|
| Cdkn2aip      | 5.6 | 5.0 | 5.8  | 6.1  | 5.3 | 5.2 | 5.8  | 5.6  |
| Cenpv         | 3.8 | 4.1 | 3.6  | 3.5  | 3.4 | 3.8 | 3.2  | 3.4  |
| Cep85l        | 0.1 | -   | 1.2  | 0.8  | -   | -   | 0.9  | 0.5  |
| Ces2e         | 4.0 | 4.4 | 3.4  | 2.9  | 3.8 | 3.5 | 3.1  | 3.3  |
| Cfap43        | 5.4 | 4.9 | 5.0  | 6.3  | 5.6 | 6.0 | 6.8  | 6.7  |
| Chsy1         | 2.9 | 3.5 | 2.0  | 2.4  | 2.5 | 3.5 | 2.1  | 1.9  |
| Cmtr2         | 4.7 | 4.5 | 4.9  | 5.3  | 4.5 | 4.8 | 5.4  | 5.4  |
| Commd5        | 4.3 | 4.5 | 4.3  | 3.9  | 4.5 | 4.3 | 3.6  | 3.9  |
| Coq10b        | 5.5 | 5.7 | 6.2  | 6.0  | 6.1 | 5.5 | 6.2  | 6.4  |
| Cpz           | 0.7 | 0.6 | 0.0  | -0.4 | 2.3 | 2.4 | 2.2  | 1.8  |
| Crabp2        | 1.1 | 1.3 | 0.8  | 0.7  | -   | -   | -1.2 | -0.5 |
| Csn3          | 1.1 | 1.3 | 0.4  | 0.5  | 0.2 | 0.3 | -0.5 | -1.2 |
| Csnk2a2       | 4.4 | 4.6 | 2.7  | 2.8  | 2.4 | 4.0 | 2.4  | 1.6  |
| Cspp1         | 2.7 | 2.7 | 3.1  | 3.2  | 2.9 | 2.7 | 3.3  | 2.9  |
| Csrnp1        | 4.7 | 4.6 | 6.2  | 6.7  | 5.7 | 4.2 | 7.4  | 6.9  |
| Cul3          | 6.4 | 6.4 | 4.5  | 4.8  | 4.1 | 6.5 | 4.7  | 4.4  |
| Cxx1a         | 3.5 | 3.5 | 3.0  | 3.2  | 3.2 | 3.2 | 3.0  | 2.9  |
| Cxx1b         | 3.6 | 3.9 | 3.3  | 3.3  | 3.1 | 3.5 | 3.0  | 3.1  |
| Cyhr1         | 6.8 | 6.4 | 4.2  | 5.2  | 4.1 | 6.3 | 5.2  | 3.8  |
| Cyr61         | 7.3 | 7.4 | 10.6 | 10.7 | 8.1 | 7.4 | 10.2 | 11.3 |
| Ddit4l        | 4.1 | 3.9 | 3.5  | 3.5  | 3.8 | 3.4 | 3.4  | 3.4  |
| Dhrs3         | 2.5 | 2.7 | 1.9  | 2.0  | 2.5 | 3.0 | 2.4  | 2.5  |
| Dnajc18       | 5.4 | 5.1 | 4.8  | 4.9  | 4.4 | 4.7 | 4.5  | 4.2  |
| Dnhd1         | 1.0 | 0.4 | 0.0  | -0.1 | 0.7 | 0.7 | 0.5  | 0.3  |
| Dok1          | 5.6 | 5.3 | 5.2  | 5.2  | 6.1 | 5.9 | 5.5  | 5.4  |
| Dtwd2         | 2.3 | 2.4 | 2.9  | 2.7  | 1.8 | 2.0 | 2.2  | 2.1  |
| Dus4l         | 3.6 | 3.5 | 4.0  | 4.1  | 3.2 | 3.6 | 4.0  | 3.6  |
| Dusp5         | 3.4 | 3.7 | 4.9  | 6.3  | 5.5 | 4.5 | 6.9  | 6.9  |
| Dusp6         | 5.5 | 5.9 | 6.8  | 7.5  | 7.0 | 7.4 | 8.3  | 8.4  |
| E130102H24Rik | 0.5 | 0.7 | -0.3 | -0.4 | 0.5 | 0.5 | 0.1  | 0.2  |
| Eda2r         | 4.7 | 5.0 | 4.9  | 5.2  | 4.3 | 4.7 | 5.1  | 5.1  |
| Edn1          | 2.1 | 2.8 | 4.4  | 3.6  | 2.7 | 3.1 | 4.0  | 3.2  |
| Egln1         | 4.9 | 5.1 | 3.2  | 3.1  | 2.6 | 4.3 | 2.3  | 2.2  |
| Egr1          | 6.3 | 6.1 | 7.8  | 8.7  | 6.9 | 5.4 | 9.4  | 9.5  |
| Egr2          | -   | -   | 0.6  | 3.2  | -   | -   | 4.9  | 5.5  |
| Eid2b         | 3.4 | 2.8 | 3.0  | 2.7  | 3.1 | 3.2 | 2.6  | 2.7  |
| Epha2         | 5.6 | 6.2 | 5.8  | 6.9  | 5.4 | 6.0 | 6.9  | 6.5  |
| Errfi1        | 4.9 | 4.8 | 5.5  | 6.5  | 6.3 | 5.9 | 8.5  | 8.5  |



|         |     |     |      |      |     |     |      |      |
|---------|-----|-----|------|------|-----|-----|------|------|
| Exog    | 4.4 | 4.0 | 3.9  | 4.0  | 4.4 | 4.5 | 4.0  | 4.0  |
| F3      | 3.6 | 3.8 | 4.5  | 4.5  | 5.6 | 5.2 | 6.2  | 7.4  |
| Fam110c | 0.7 | 0.6 | 1.3  | 0.8  | 4.3 | 4.5 | 4.8  | 5.0  |
| Fam120a | 6.5 | 7.2 | 5.6  | 5.8  | 5.9 | 6.7 | 5.8  | 5.4  |
| Fam98c  | 3.8 | 3.5 | 3.7  | 3.3  | 3.7 | 3.6 | 3.1  | 3.4  |
| Fblim1  | 2.4 | 2.3 | 1.6  | 1.9  | 4.0 | 4.4 | 3.8  | 4.0  |
| Fbxo30  | 5.7 | 5.5 | 5.7  | 6.2  | 5.9 | 5.9 | 6.4  | 6.6  |
| Fbxo44  | 2.6 | 2.4 | 1.8  | 1.6  | 3.1 | 2.9 | 2.9  | 2.5  |
| Filip1l | 4.0 | 4.0 | 4.4  | 4.5  | 3.3 | 3.7 | 4.3  | 4.6  |
| Flt3l   | 2.4 | 2.4 | 1.9  | 2.0  | 2.7 | 2.2 | 2.4  | 2.2  |
| Fos     | 4.2 | 4.5 | 8.0  | 6.3  | 5.8 | 3.9 | 8.0  | 7.7  |
| Fosb    | -   | -   | -    | -    | -   | -   | -    | -    |
| G2e3    | 1.6 | 1.1 | 2.0  | 2.1  | 1.0 | 2.0 | 4.0  | 2.3  |
| G2e3    | 4.6 | 4.5 | 5.0  | 5.2  | 4.6 | 5.0 | 5.0  | 5.0  |
| Gadd45g | 4.6 | 4.9 | 7.4  | 6.3  | 3.8 | 3.7 | 5.5  | 6.7  |
| Gid8    | 3.3 | 3.3 | 2.7  | 3.0  | 3.1 | 3.5 | 3.2  | 2.8  |
| Git1    | 6.1 | 5.9 | 4.0  | 4.7  | 4.3 | 6.1 | 5.0  | 3.7  |
| Glrb    | 3.5 | 3.2 | 3.2  | 3.1  | 1.3 | 1.3 | 0.6  | 0.9  |
| Gm10254 | 5.1 | 5.1 | 5.3  | 5.6  | 5.0 | 5.1 | 5.6  | 5.6  |
| Gm12565 | 1.9 | 1.7 | 1.6  | 1.2  | 1.3 | 1.3 | 0.9  | 0.9  |
| Gm12715 | 7.3 | 8.2 | 8.2  | 8.3  | 7.7 | 7.7 | 8.3  | 8.7  |
| Gm12966 | 5.3 | 5.4 | 5.9  | 5.4  | 5.0 | 5.2 | 5.5  | 5.7  |
| Gm14295 | 2.1 | 2.3 | 2.9  | 2.9  | 2.4 | 2.8 | 2.5  | 3.1  |
| Gm15270 | -   | -   | -    | -    | -   | -   | -    | -    |
| Gm15270 | 0.2 | 0.4 | 0.7  | 0.3  | 0.3 | 0.8 | 1.0  | 1.4  |
| Gm17501 | 1.3 | 1.2 | 2.3  | 2.0  | 1.1 | 0.6 | -0.1 | 1.2  |
| Gm20541 | 1.7 | 1.6 | 2.2  | 2.2  | 0.4 | 0.8 | 2.0  | 1.7  |
| Gm26648 | 2.0 | 1.9 | 1.2  | 0.9  | 1.4 | 1.3 | 1.6  | 0.4  |
| Gm42547 | 1.2 | 0.9 | -0.5 | -1.0 | 0.0 | 1.4 | 0.0  | -1.2 |
| Gm43579 | 1.3 | 1.6 | 0.6  | 0.7  | 1.0 | 0.7 | 0.2  | 0.2  |
| Gm6685  | 0.2 | 0.0 | 0.6  | 0.8  | 0.8 | 0.0 | 1.1  | 0.8  |
| Gm6710  | 2.5 | 2.7 | 3.3  | 3.2  | 1.2 | 2.2 | 2.8  | 2.5  |
| Gm7436  | 1.2 | 0.7 | 0.9  | 0.1  | 0.6 | 0.4 | -0.3 | -0.2 |
| Gm8185  | 2.2 | 2.4 | 2.4  | 1.7  | 2.3 | 2.0 | 1.7  | 1.6  |
| Gm8261  | 0.2 | 0.1 | 0.2  | 0.7  | 0.2 | 0.3 | 1.0  | 0.9  |
| Gm8752  | 2.4 | 2.7 | 2.6  | 2.9  | 1.9 | 2.3 | 2.7  | 2.9  |
| Gm9726  | 2.3 | 2.2 | 1.4  | 1.5  | 1.6 | 2.3 | 1.6  | 1.0  |
| Gpr137  | 3.3 | 3.1 | 2.8  | 2.6  | 3.1 | 3.3 | 3.0  | 2.6  |
| Gpsm3   | 2.2 | 1.7 | 1.3  | 1.3  | 2.3 | 2.4 | 2.2  | 1.8  |

|          |     |     |      |      |     |     |     |     |
|----------|-----|-----|------|------|-----|-----|-----|-----|
| Guca1a   | 1.5 | 1.0 | 1.1  | 0.5  | 1.5 | 1.1 | 0.6 | 0.5 |
| H2-Q2    | 4.8 | 4.7 | 4.8  | 4.3  | 2.8 | 3.1 | 2.6 | 2.5 |
| Hbegf    | 3.2 | 3.4 | 4.4  | 4.9  | 3.3 | 2.9 | 4.1 | 4.1 |
| Heca     | 4.1 | 3.6 | 0.9  | 1.8  | 1.6 | 3.7 | 1.8 | 0.2 |
| Hes1     | 3.2 | 3.8 | 5.9  | 5.6  | 4.0 | 3.1 | 5.8 | 5.5 |
| Hilpda   | 4.8 | 4.8 | 6.2  | 5.5  | 6.0 | 4.7 | 6.1 | 5.8 |
| Hint3    | 3.7 | 3.8 | 3.6  | 3.1  | 3.5 | 3.7 | 3.4 | 3.3 |
| Hlx      | 0.6 | 1.1 | 0.3  | 0.7  | 1.5 | 1.8 | 0.8 | 0.9 |
| Hoxa9    | 2.8 | 2.7 | 2.6  | 2.3  | 2.4 | 1.8 | 1.3 | 1.2 |
| Hoxb2    | 3.3 | 3.3 | 2.9  | 2.6  | 4.1 | 3.0 | 1.9 | 2.4 |
| Hyal1    | 2.8 | 3.0 | 1.9  | 2.4  | 2.0 | 2.4 | 1.6 | 1.6 |
| Iba57    | 1.5 | 1.9 | 2.1  | 2.7  | 1.4 | 1.6 | 2.6 | 2.5 |
| Id1      | 4.0 | 4.7 | 6.6  | 6.4  | 6.5 | 4.8 | 6.6 | 6.1 |
| Id2      | 3.8 | 3.8 | 5.5  | 5.0  | 4.2 | 2.8 | 4.1 | 4.2 |
| Id3      | 7.2 | 7.3 | 9.0  | 8.5  | 8.5 | 7.5 | 8.7 | 8.7 |
| Ier2     | 6.0 | 5.9 | 7.2  | 7.5  | 6.7 | 5.5 | 7.9 | 8.2 |
| Ier5     | 4.6 | 4.2 | 5.1  | 5.5  | 5.7 | 4.6 | 6.5 | 6.6 |
| Ifrd1    | 7.8 | 7.6 | 8.1  | 8.2  | 8.2 | 7.7 | 8.6 | 8.4 |
| Irak2    | 5.7 | 5.6 | 6.0  | 6.0  | 6.1 | 6.1 | 6.4 | 6.6 |
| Itgb2    | 2.8 | 2.9 | 1.9  | 2.3  | 2.2 | 2.3 | 1.8 | 2.0 |
| Itgb7    | 5.5 | 5.1 | 4.5  | 4.5  | 4.0 | 4.3 | 4.0 | 3.7 |
| Jun      | 5.9 | 5.7 | 7.5  | 6.8  | 7.7 | 5.3 | 8.7 | 7.8 |
| Junb     | 7.2 | 7.2 | 8.1  | 7.8  | 7.9 | 6.7 | 8.5 | 8.6 |
| Klf10    | 6.1 | 5.9 | 7.2  | 7.8  | 6.8 | 6.3 | 7.8 | 7.3 |
| Klf11    | 5.3 | 4.7 | 5.2  | 6.1  | 4.9 | 4.8 | 5.6 | 5.3 |
| Klf13    | 5.8 | 5.8 | 5.0  | 5.4  | 5.2 | 5.6 | 5.5 | 4.6 |
| Lmnb1    | 4.8 | 4.4 | 4.8  | 5.8  | 4.0 | 3.9 | 4.7 | 4.3 |
| Lpar1    | 0.4 | 0.0 | 1.8  | 1.9  | 1.0 | 2.1 | 2.2 | 2.4 |
| Luc7l3   | 4.8 | 5.0 | 4.3  | 4.6  | 4.4 | 4.3 | 3.9 | 4.2 |
| Lypd1    | 0.0 | 0.1 | -0.8 | -1.1 | 2.9 | 1.6 | 0.9 | 0.7 |
| Lysmd3   | 4.6 | 4.4 | 4.9  | 5.5  | 4.5 | 4.7 | 5.3 | 5.0 |
| Mafk     | 6.6 | 6.5 | 6.7  | 7.2  | 6.3 | 6.2 | 7.1 | 7.1 |
| Mapk3    | 6.7 | 6.5 | 6.2  | 6.3  | 6.3 | 6.6 | 6.4 | 6.0 |
| Mars2    | 4.0 | 4.0 | 4.1  | 4.6  | 3.7 | 3.9 | 4.3 | 4.2 |
| Mbd2     | 6.6 | 6.5 | 3.6  | 4.6  | 3.7 | 6.7 | 4.3 | 2.8 |
| Mex3d    | 5.0 | 5.1 | 2.6  | 3.8  | 3.1 | 5.0 | 3.6 | 2.3 |
| Mir99ahg | 1.7 | 1.8 | 2.4  | 2.6  | 1.8 | 1.5 | 2.5 | 2.1 |
| Mms22l   | 5.0 | 5.2 | 5.1  | 5.3  | 4.6 | 4.8 | 5.1 | 5.2 |
| Mri1     | 5.7 | 5.6 | 5.6  | 5.3  | 6.0 | 5.9 | 5.5 | 5.6 |
| Mta1     | 5.0 | 5.0 | 2.9  | 4.0  | 3.3 | 4.9 | 3.7 | 2.6 |

|           |     |     |     |     |     |     |     |     |
|-----------|-----|-----|-----|-----|-----|-----|-----|-----|
| Mxd4      | 4.4 | 4.4 | 3.8 | 3.7 | 3.9 | 3.3 | 3.7 | 3.2 |
| Myc       | 6.9 | 7.0 | 8.1 | 7.8 | 8.1 | 7.7 | 8.7 | 8.4 |
| Nabp1     | 4.3 | 4.4 | 4.5 | 5.4 | 5.2 | 4.7 | 6.0 | 5.8 |
| Nfil3     | 5.7 | 5.4 | 6.1 | 6.1 | 6.1 | 5.4 | 6.2 | 6.2 |
| Nfix      | 5.5 | 5.7 | 4.0 | 4.1 | 4.0 | 5.0 | 4.3 | 3.4 |
| Nfkb1     | 4.4 | 4.7 | 3.8 | 3.7 | 3.5 | 4.4 | 4.0 | 3.2 |
| Nfkbid    | 1.9 | 1.6 | 0.3 | 0.9 | 2.4 | 1.7 | 0.6 | 1.3 |
| Nop58     | 6.1 | 6.4 | 6.6 | 7.0 | 6.4 | 6.4 | 6.9 | 6.7 |
| Nppb      | 1.4 | 2.2 | 3.4 | 4.0 | 0.1 | 0.2 | 2.4 | 3.0 |
| Nr4a1     | 2.5 | 2.5 | 5.7 | 6.0 | 5.0 | 2.2 | 8.4 | 8.6 |
| Nudt16    | 4.3 | 4.2 | 4.2 | 3.5 | 4.7 | 4.5 | 3.9 | 4.0 |
| Nufip2    | 6.0 | 6.0 | 5.8 | 7.0 | 6.2 | 5.9 | 7.4 | 6.8 |
| Osbp      | 5.8 | 5.6 | 3.5 | 4.3 | 3.5 | 5.7 | 4.6 | 2.9 |
| Oxd1      | 2.2 | 2.3 | 1.5 | 1.6 | 2.7 | 2.4 | 1.8 | 1.7 |
| Palm3     | 1.3 | 1.4 | 1.9 | 1.4 | 0.1 | 0.4 | 1.0 | 0.9 |
| Pcdhb22   | 1.6 | 1.3 | 1.8 | 1.4 | 1.0 | 1.2 | 1.6 | 1.4 |
| Pcdhga8   | 3.8 | 4.6 | 4.2 | 2.8 | 3.8 | 3.6 | 1.4 | 2.4 |
| Pdgfa     | 3.8 | 4.0 | 3.6 | 3.2 | 3.5 | 3.4 | 2.7 | 2.9 |
| Pgam1-ps1 | 0.5 | 0.1 | 0.9 | 0.9 | 0.1 | -   | 0.5 | 0.4 |
| Pgpep1    | 4.8 | 4.8 | 4.5 | 4.2 | 4.2 | 4.4 | 4.0 | 3.9 |
| Phc3      | 2.8 | 3.1 | 3.2 | 3.7 | 2.5 | 2.9 | 3.9 | 3.4 |
| Phf13     | 5.8 | 5.5 | 4.7 | 4.9 | 5.6 | 5.7 | 5.1 | 5.3 |
| Platr16   | 1.3 | 1.3 | 1.7 | 1.8 | 0.9 | 1.3 | 1.4 | 1.5 |
| Plk2      | 7.3 | 7.1 | 8.6 | 8.4 | 8.4 | 7.8 | 9.3 | 9.5 |
| Ppt2      | 4.3 | 4.1 | 3.6 | 3.8 | 4.1 | 3.9 | 3.5 | 3.4 |
| Pramef8   | 5.4 | 5.1 | 5.7 | 5.5 | 5.2 | 5.2 | 5.6 | 5.6 |
| Prps1l3   | 5.4 | 5.2 | 5.6 | 5.8 | 5.7 | 5.5 | 5.7 | 5.8 |
| Ptbp2     | 3.4 | 3.7 | 4.2 | 4.0 | 2.5 | 3.5 | 3.7 | 3.6 |
| Ptp4a3    | 3.9 | 4.1 | 3.4 | 3.0 | 4.7 | 4.2 | 3.7 | 4.4 |
| Pus7l     | 2.4 | 2.5 | 2.9 | 3.2 | 2.3 | 3.1 | 3.1 | 3.1 |
| Qk        | 6.5 | 6.6 | 4.9 | 5.1 | 4.8 | 6.7 | 4.9 | 4.2 |
| Rab30     | 1.8 | 2.0 | 2.6 | 2.5 | 1.3 | 1.6 | 1.8 | 1.9 |
| Ranbp9    | 4.8 | 5.1 | 3.3 | 3.5 | 3.2 | 4.8 | 3.3 | 3.2 |
| Rasl11b   | 2.1 | 1.8 | 3.0 | 3.2 | 2.5 | 2.3 | 3.2 | 3.7 |
| Rdh10     | 2.9 | 2.8 | 3.0 | 3.2 | 2.5 | 2.7 | 3.2 | 3.0 |
| Rgs2      | -   | -   |     |     |     | -   |     |     |
| Rgs2      | 0.2 | 0.5 | 2.4 | 1.2 | 0.6 | 1.0 | 4.7 | 3.4 |
| Rnd3      | 7.4 | 7.1 | 7.9 | 8.0 | 7.8 | 8.1 | 8.6 | 8.6 |
| Rnf113a1  | 3.0 | 2.9 | 2.6 | 2.6 | 2.9 | 2.7 | 2.0 | 2.1 |
| Rnf126    | 5.4 | 5.4 | 4.8 | 5.1 | 5.0 | 5.4 | 5.0 | 4.6 |
| Rnf145    | 5.5 | 5.4 | 4.2 | 4.6 | 4.7 | 5.4 | 4.3 | 5.1 |

|               |     |     |      |      |     |     |      |      |
|---------------|-----|-----|------|------|-----|-----|------|------|
| Rom1          | 2.3 | 1.7 | 1.7  | 1.1  | 1.2 | 1.6 | 0.7  | 0.2  |
| RP23-325D10.4 | 0.9 | 0.8 | -0.3 | 0.3  | 0.5 | 0.6 | 0.3  | 0.0  |
| Rps12-ps19    | 0.3 | 0.9 | 0.2  | 0.1  | 0.1 | 0.4 | -0.4 | -0.3 |
| Rrnad1        | 3.7 | 3.3 | 2.9  | 2.9  | 3.0 | 3.1 | 3.0  | 2.7  |
| Rundc3a       | 0.6 | 0.7 | 0.1  | -0.5 | 0.1 | 0.2 | -0.5 | 0.1  |
| Rxra          | 4.7 | 4.7 | 3.2  | 3.2  | 3.6 | 5.2 | 3.7  | 3.2  |
| Samd1         | 2.4 | 3.0 | 1.6  | 1.7  | 1.5 | 1.8 | 1.2  | 0.4  |
| Scrn2         | 2.7 | 2.6 | 2.2  | 2.2  | 3.2 | 3.2 | 2.8  | 3.2  |
| Sertad1       | 5.4 | 5.5 | 6.3  | 6.4  | 6.1 | 5.1 | 6.7  | 7.0  |
| Sertad3       | 3.9 | 3.5 | 2.6  | 3.3  | 4.4 | 4.0 | 3.1  | 3.3  |
| Shisa4        | 3.2 | 3.3 | 2.8  | 2.7  | 2.5 | 2.5 | 2.3  | 2.3  |
| Slc25a25      | 4.9 | 4.5 | 5.4  | 5.8  | 4.7 | 4.6 | 6.5  | 6.6  |
| Slc25a32      | 4.3 | 4.5 | 4.9  | 5.0  | 4.6 | 4.6 | 4.8  | 4.9  |
| Slc33a1       | 4.8 | 5.0 | 5.2  | 5.2  | 4.5 | 5.1 | 5.2  | 5.3  |
| Slc38a2       | 7.1 | 7.2 | 7.0  | 8.5  | 6.7 | 7.5 | 8.7  | 8.2  |
| Slc4a11       | 3.7 | 3.8 | 2.9  | 3.0  | 2.6 | 2.3 | 1.7  | 2.4  |
| Snhg20        | 3.7 | 3.9 | 3.4  | 3.4  | 3.5 | 3.4 | 2.9  | 3.1  |
| Snx21         | 4.9 | 4.5 | 4.5  | 4.0  | 4.5 | 4.6 | 4.3  | 4.1  |
|               |     |     |      |      | -   |     |      |      |
| Srrm4         | 0.5 | 0.9 | 1.5  | 1.6  | 1.0 | 0.3 | 2.2  | 1.2  |
| Srsf5         | 7.3 | 7.4 | 7.6  | 7.6  | 7.2 | 7.2 | 7.6  | 7.7  |
| Steap3        | 3.1 | 2.7 | 2.3  | 2.1  | 3.0 | 3.8 | 3.3  | 2.7  |
| Tada2b        | 4.6 | 4.6 | 2.4  | 3.1  | 1.7 | 4.0 | 2.3  | 1.7  |
| Tcf15         | 4.5 | 4.5 | 1.9  | 2.5  | 0.3 | 3.5 | 1.3  | 0.2  |
| Thap11        | 5.7 | 5.5 | 5.4  | 5.0  | 5.5 | 5.5 | 5.0  | 5.1  |
| Thbd          | 4.2 | 4.3 | 4.0  | 5.3  | 5.5 | 5.8 | 7.1  | 6.6  |
| Tmbim6        | 8.3 | 8.2 | 7.3  | 7.8  | 7.2 | 8.2 | 7.9  | 7.0  |
| Tmem185b      | 4.5 | 4.8 | 5.3  | 5.2  | 4.8 | 4.7 | 5.3  | 5.2  |
| Tmem265       | 1.9 | 1.7 | 1.3  | 1.2  | 1.7 | 1.7 | 0.8  | 0.4  |
| Tmem69        | 3.0 | 3.2 | 3.6  | 3.5  | 2.6 | 2.6 | 3.5  | 3.5  |
| Tra2b         | 7.0 | 7.2 | 7.3  | 7.6  | 6.9 | 7.1 | 7.6  | 7.5  |
| Trib1         | 2.0 | 2.5 | 3.4  | 5.0  | 2.1 | 3.3 | 5.5  | 5.4  |
| Trim11        | 5.0 | 4.9 | 4.5  | 4.6  | 4.7 | 4.6 | 4.1  | 4.5  |
| Trim16        | 4.8 | 4.8 | 5.2  | 5.8  | 5.0 | 4.9 | 5.1  | 5.3  |
| Trim6         | 2.2 | 2.0 | 2.5  | 2.6  | 2.0 | 2.2 | 2.6  | 2.1  |
| Trmt5         | 3.6 | 3.7 | 4.0  | 4.1  | 3.5 | 3.7 | 3.7  | 3.8  |
| Tshz1         | 3.2 | 3.3 | 2.7  | 2.8  | 2.6 | 3.2 | 2.9  | 2.4  |
| Tst           | 1.3 | 1.2 | 0.8  | 0.6  | 2.3 | 2.8 | 2.3  | 2.0  |
| Ufsp1         | 3.0 | 2.9 | 2.7  | 2.3  | 2.9 | 2.8 | 2.4  | 2.6  |
| Uprt          | 1.6 | 1.4 | 1.7  | 2.0  | 1.9 | 2.0 | 2.4  | 2.4  |
| Usp49         | 2.0 | 3.0 | 1.7  | 1.8  | 2.1 | 2.0 | 1.6  | 1.2  |
| Vgll3         | 5.3 | 5.6 | 5.9  | 6.0  | 5.3 | 5.6 | 6.1  | 6.2  |

|         |     |     |     |      |     |     |     |     |
|---------|-----|-----|-----|------|-----|-----|-----|-----|
| Wsb1    | 6.9 | 7.0 | 7.6 | 7.9  | 6.9 | 7.0 | 8.1 | 8.2 |
| Wtip    | 4.9 | 4.7 | 1.2 | 2.6  | 1.8 | 4.6 | 2.4 | 1.0 |
| Xkr8    | 3.6 | 3.5 | 3.2 | 3.3  | 4.4 | 3.9 | 3.5 | 3.6 |
| Zbtb7b  | 4.1 | 4.2 | 3.4 | 3.7  | 4.3 | 4.0 | 4.1 | 3.3 |
| Zc2hc1c | 1.8 | 1.1 | 1.3 | 0.4  | 2.2 | 2.0 | 1.0 | 0.9 |
| Zfand5  | 6.8 | 6.6 | 6.9 | 7.2  | 6.8 | 6.9 | 7.3 | 7.3 |
| Zfp119a | 2.5 | 2.7 | 3.4 | 3.5  | 2.3 | 3.0 | 3.8 | 3.6 |
| Zfp236  | 2.8 | 3.1 | 1.7 | 2.8  | 2.6 | 2.7 | 1.9 | 1.9 |
| Zfp296  | 3.1 | 2.9 | 2.9 | 2.5  | 3.8 | 3.4 | 2.7 | 2.7 |
| Zfp30   | 2.2 | 1.7 | 1.9 | 1.2  | 2.0 | 1.6 | 1.1 | 1.1 |
| Zfp36   | 5.1 | 5.0 | 6.1 | 6.1  | 7.3 | 4.8 | 8.2 | 7.7 |
| Zfp433  | 3.1 | 3.1 | 3.9 | 3.9  | 3.2 | 3.3 | 4.0 | 3.6 |
| Zfp668  | 3.6 | 3.5 | 3.0 | 3.0  | 3.1 | 3.4 | 3.1 | 2.9 |
| Zfp688  | 4.6 | 4.1 | 4.4 | 3.7  | 4.6 | 4.1 | 3.6 | 3.5 |
| Zfp747  | 2.9 | 2.7 | 3.0 | 3.2  | 2.4 | 2.8 | 3.5 | 3.3 |
| Zfp947  | 1.2 | 1.0 | 2.0 | 2.2  | 0.5 | 1.6 | 2.4 | 1.6 |
| Zfp958  | 4.7 | 4.2 | 4.2 | 4.3  | 4.6 | 4.3 | 4.0 | 3.7 |
| Zfp959  | 3.4 | 3.2 | 3.8 | 4.0  | 2.6 | 3.2 | 3.8 | 4.0 |
| Zfpm1   | 4.7 | 4.5 | 1.7 | 3.0  | 1.8 | 4.7 | 2.1 | 1.2 |
| Zmym1   | 4.2 | 4.1 | 4.3 | 4.9  | 4.4 | 4.6 | 4.8 | 4.9 |
| Znrf2   | 4.6 | 4.7 | 1.8 | 2.6  | 2.4 | 4.5 | 2.7 | 1.8 |
| Zrsr1   | 1.3 | 1.0 | 0.7 | -0.2 | 1.6 | 1.2 | 0.5 | 0.8 |

**Supplement Table 2:** Incongruent Genes used in the heat map.

| Gene Symbol   | WT static | WT static 2 | WT perfused | WT perfused 2 | R899X static | R899X static 2 | R899X perfused 2 | R899X perfused |
|---------------|-----------|-------------|-------------|---------------|--------------|----------------|------------------|----------------|
| 1500004A13Rik | 0.8       | 1.3         | 0.2         | 1.1           | 0.6          | 0.9            | 1.9              | 1.3            |
| 1700030J22Rik | 0.4       | 0.6         | 0.3         | 0.3           | 0.3          | 0.0            | 0.4              | 0.7            |
| 1810010H24Rik | 2.6       | 2.3         | 1.4         | 1.5           | 0.5          | 1.6            | 2.2              | 1.7            |
| 5031425E22Rik | 3.2       | 3.2         | 3.1         | 3.1           | 2.3          | 2.3            | 2.9              | 2.8            |
| 6330408A02Rik | 2.4       | 2.4         | 2.0         | 2.1           | 1.5          | 2.4            | 2.8              | 2.6            |
| A630052C17Rik | 2.2       | 2.1         | 1.7         | 1.5           | 0.9          | 1.6            | 1.7              | 1.6            |
| A830082K12Rik | 2.0       | 2.0         | 2.5         | 2.5           | 2.3          | 2.4            | 2.1              | 1.8            |
| A930005H10Rik | 2.7       | 2.6         | 2.1         | 1.8           | 2.0          | 1.8            | 2.2              | 1.5            |
| Abcb9         | 0.9       | 0.8         | 0.2         | 0.3           | 0.4          | 0.1            | 0.7              | 0.3            |
| AC158396.1    | 3.2       | 3.3         | 3.5         | 3.2           | 3.3          | 3.0            | 2.4              | 2.7            |
| Acss2         | 2.0       | 1.8         | 1.8         | 2.0           | 2.3          | 2.3            | 1.8              | 2.0            |
| Adck4         | 4.7       | 4.4         | 4.7         | 4.5           | 5.0          | 5.0            | 4.5              | 4.7            |
| Adm           | 0.5       | 0.9         | 0.9         | 0.8           | 1.7          | 0.2            | 0.5              | 1.3            |
| Adrb2         | 2.4       | 2.6         | 2.9         | 2.6           | 1.9          | 1.6            | 2.8              | 2.9            |
| Aipl1         | 1.7       | 1.7         | 0.9         | 0.8           | 0.9          | 0.8            | 1.0              | 0.7            |
| Alkbh4        | 4.4       | 4.3         | 4.5         | 4.0           | 3.9          | 4.0            | 3.1              | 3.2            |
| Ank3          | 3.0       | 2.4         | 1.7         | 2.8           | 1.5          | 1.4            | 0.2              | 0.2            |
| Ap1s2         | 3.9       | 4.2         | 4.5         | 4.6           | 3.7          | 3.7            | 4.0              | 3.7            |
| Arc           | 1.9       | 1.4         | 2.4         | 3.4           | 0.9          | 0.4            | 3.8              | 5.2            |
| Arhgef6       | 2.1       | 1.7         | 1.6         | 2.1           | 0.9          | 1.4            | 2.3              | 1.9            |
| Armxc5        | 3.6       | 3.7         | 3.4         | 3.5           | 3.1          | 3.6            | 3.8              | 4.0            |
| Arsj          | 1.3       | 1.4         | 2.0         | 2.0           | 2.4          | 2.2            | 1.3              | 1.9            |
| Asic3         | 3.8       | 3.1         | 3.8         | 3.5           | 1.3          | 1.2            | 0.4              | 0.4            |
| Asna1         | 6.6       | 6.6         | 6.1         | 6.1           | 5.5          | 6.0            | 5.9              | 5.4            |
| Ass1          | 3.2       | 3.6         | 2.4         | 2.6           | 2.5          | 3.3            | 3.4              | 2.4            |
| Atp6v0d1      | 7.2       | 7.2         | 6.4         | 6.5           | 5.9          | 6.6            | 6.6              | 6.0            |
| B3galnt1      | 0.3       | 0.2         | 2.0         | 2.0           | 4.7          | 4.6            | 4.4              | 4.7            |
| B4galnt2      | 1.1       | 0.7         | 0.3         | 0.0           | 0.8          | 0.2            | 0.0              | 0.6            |

|               |     |     |     |     |     |     |     |     |
|---------------|-----|-----|-----|-----|-----|-----|-----|-----|
| BC023105      | 4.3 | 3.7 | 4.2 | 3.8 | 3.8 | 3.8 | 4.7 | 4.3 |
| Bcam          | 2.9 | 2.7 | 2.0 | 1.3 | 3.3 | 3.6 | 3.5 | 3.1 |
| Bcas3         | 5.1 | 5.0 | 4.7 | 4.8 | 3.5 | 4.5 | 4.9 | 4.6 |
| Bcdin3d       | 2.8 | 2.5 | 2.9 | 2.3 | 3.0 | 2.9 | 2.5 | 2.1 |
| Brd3          | 5.8 | 5.8 | 5.2 | 5.5 | 5.1 | 5.7 | 5.4 | 5.5 |
| Btg3          | 4.1 | 4.2 | 4.6 | 4.9 | 4.6 | 4.5 | 4.2 | 4.2 |
| C630043F03Rik | 0.5 | 1.1 | 1.2 | 0.8 | 1.4 | 1.2 | 0.9 | 0.9 |
| C920006O11Rik | 0.7 | 0.3 | 0.3 | 0.2 | 0.4 | 0.5 | 0.4 | 0.2 |
| Cacnb1        | 0.8 | 0.4 | 0.7 | 0.4 | 1.1 | 0.7 | 0.1 | 0.3 |
| Calr3         | 1.8 | 1.6 | 2.3 | 1.9 | 2.1 | 2.3 | 1.5 | 1.8 |
| Ccdc163       | 1.9 | 1.7 | 2.2 | 2.1 | 2.6 | 2.1 | 1.6 | 1.9 |
| Cers4         | 3.4 | 3.3 | 3.0 | 2.6 | 4.0 | 4.2 | 3.7 | 4.3 |
| Ces2g         | 4.7 | 4.9 | 4.4 | 4.3 | 5.8 | 5.9 | 5.8 | 5.9 |
| Cited2        | 6.0 | 5.9 | 6.5 | 6.0 | 5.6 | 6.2 | 7.1 | 7.1 |
| Coq10a        | 5.0 | 4.8 | 4.4 | 4.5 | 4.7 | 4.7 | 4.5 | 4.7 |
| Csrp1         | 7.3 | 7.4 | 7.2 | 7.2 | 6.4 | 6.5 | 7.0 | 6.8 |
| Cyb5d2        | 2.8 | 2.8 | 2.2 | 2.3 | 2.4 | 2.5 | 2.7 | 2.6 |
| D130017N08Rik | 2.3 | 2.6 | 1.9 | 1.8 | 1.2 | 1.4 | 1.5 | 1.4 |
| Def6          | 2.8 | 2.5 | 1.8 | 1.5 | 3.1 | 4.0 | 3.8 | 3.8 |
| Dlx2          | 2.3 | 2.8 | 3.6 | 3.9 | 3.1 | 3.0 | 3.2 | 3.4 |
| E230001N04Rik | 1.4 | 1.7 | 0.7 | 0.3 | 0.1 | 1.2 | 1.0 | 0.6 |
| Eif3s6-ps4    | 1.1 | 0.8 | 1.2 | 0.9 | 0.1 | 0.1 | 0.7 | 0.8 |
| Eva1b         | 3.4 | 3.3 | 3.3 | 3.0 | 4.3 | 4.0 | 3.6 | 3.7 |
| Exoc3l4       | 4.2 | 4.2 | 4.7 | 4.0 | 4.4 | 4.5 | 3.9 | 3.7 |
| Fam213a       | 2.5 | 2.5 | 1.6 | 1.7 | 3.9 | 4.1 | 4.0 | 4.1 |
| Fam43a        | 0.7 | 0.4 | 0.2 | 1.7 | 0.2 | 0.8 | 1.3 | 0.9 |
| Fam53c        | 6.5 | 6.2 | 5.8 | 6.8 | 5.3 | 5.7 | 6.5 | 6.2 |
| Fcor          | 1.6 | 2.2 | 2.3 | 1.7 | 0.4 | 0.6 | 0.1 | 0.1 |
| Flot2         | 7.7 | 7.5 | 7.3 | 7.1 | 6.9 | 7.5 | 7.2 | 7.2 |
| Fmo5          | 0.5 | 0.7 | 0.0 | 0.6 | 0.5 | 1.2 | 1.7 | 1.4 |
| Fnbp1         | 3.9 | 3.8 | 3.3 | 3.4 | 3.4 | 3.9 | 3.6 | 3.5 |
| Fpgt          | 4.0 | 4.0 | 4.5 | 4.8 | 4.2 | 4.3 | 4.6 | 4.3 |
| Gadd45a       | 6.3 | 6.1 | 6.6 | 6.8 | 6.8 | 6.2 | 6.5 | 5.9 |
| Gadd45b       | 4.9 | 5.2 | 6.0 | 5.9 | 5.4 | 4.7 | 4.8 | 5.1 |
| Gale          | 4.4 | 4.3 | 4.7 | 4.7 | 4.4 | 4.0 | 3.5 | 3.9 |
| Gata2         | 3.4 | 2.9 | 3.1 | 3.4 | 0.9 | 1.0 | 1.4 | 1.4 |

|         |     |     |     |     |     |     |     |     |
|---------|-----|-----|-----|-----|-----|-----|-----|-----|
| Gfra4   | 0.8 | 1.2 | 0.4 | 0.5 | 1.6 | 2.1 | 1.8 | 1.7 |
| Gimap9  | 2.2 | 2.5 | 2.8 | 2.4 | 3.4 | 3.4 | 2.6 | 3.0 |
| Gm10224 | 1.2 | 1.2 | 1.8 | 1.0 | 2.0 | 1.9 | 1.2 | 1.4 |
| Gm10335 | 4.2 | 4.4 | 4.5 | 4.1 | 4.7 | 4.5 | 3.8 | 4.1 |
| Gm11821 | 0.6 | 0.7 | 0.3 | 1.0 | 0.4 | 0.5 | 1.0 | 0.9 |
| Gm11847 | -   | -   |     |     |     |     |     |     |
|         | 0.6 | 0.4 | 0.4 | 0.7 | 0.8 | 0.9 | 0.5 | 0.2 |
| Gm12094 | 0.4 | 0.4 | 0.7 | 0.5 | 0.7 | 0.0 | 0.8 | 0.5 |
| Gm12185 | 4.8 | 4.4 | 4.7 | 4.9 | 4.1 | 4.7 | 5.3 | 5.6 |
| Gm12430 | 1.4 | 1.2 | 1.5 | 1.5 | 1.3 | 1.3 | 1.7 | 1.9 |
| Gm12502 | 0.5 | 0.1 | 0.7 | 0.0 | 0.5 | 0.3 | 0.6 | 0.6 |
| Gm12758 | 0.2 | 0.1 | 1.0 | 0.8 | 0.6 | 0.0 | 0.6 | 0.5 |
| Gm12791 | 0.9 | 0.7 | 0.5 | 0.4 | 0.2 | 0.3 | 0.9 | 0.6 |
| Gm13147 | 0.2 | 0.2 | 1.0 | 0.4 | 0.8 | 0.6 | 0.1 | 0.3 |
| Gm13331 | 1.9 | 2.0 | 2.5 | 1.9 | 2.8 | 2.5 | 2.0 | 2.3 |
| Gm13408 | 2.1 | 1.8 | 2.5 | 2.3 | 2.9 | 2.4 | 2.3 | 2.3 |
| Gm13743 | 0.3 | 0.3 | 1.0 | 0.9 | 0.6 | 0.5 | 0.2 | 0.3 |
| Gm14434 | 2.0 | 2.5 | 2.4 | 2.1 | 1.2 | 1.5 | 0.5 | 0.1 |
| Gm15710 | 5.8 | 5.9 | 6.3 | 5.5 | 5.9 | 5.6 | 5.0 | 5.2 |
| Gm18180 | 1.0 | 0.8 | 0.9 | 1.2 | 0.1 | 0.3 | 0.8 | 0.8 |
| Gm18853 | 1.9 | 2.6 | 2.2 | 2.7 | 2.6 | 3.4 | 4.2 | 4.1 |
| Gm20707 | 0.8 | 0.8 | 1.4 | 1.3 | 0.9 | 1.5 | 1.4 | 1.2 |
| Gm28437 | 8.5 | 8.7 | 9.1 | 9.4 | 9.4 | 8.6 | 9.2 | 8.7 |
| Gm43110 | 2.7 | 2.7 | 2.9 | 2.4 | 2.3 | 2.2 | 1.8 | 1.8 |
| Gm4841  | 5.6 | 5.5 | 5.6 | 5.5 | 5.7 | 5.5 | 6.1 | 6.3 |
| Gm5145  | 0.4 | 0.4 | 0.7 | 0.7 | 1.0 | 0.6 | 0.2 | 0.4 |
| Gm5385  | -   | -   | -   | -   | 0.9 | 1.0 | 0.4 | 0.1 |
| Gm5424  | 4.8 | 5.2 | 4.0 | 4.1 | 4.4 | 5.1 | 4.8 | 4.2 |
| Gm6065  | 1.5 | 1.5 | 1.6 | 1.3 | 1.7 | 1.6 | 0.8 | 1.1 |
| Gm6576  | 2.2 | 2.4 | 2.7 | 2.3 | 2.9 | 2.6 | 2.0 | 2.0 |
| Gm8210  | 4.4 | 4.4 | 4.8 | 4.2 | 4.8 | 4.5 | 3.7 | 4.0 |
| Gm8623  | 0.6 | 1.3 | 1.5 | 0.6 | 1.6 | 1.2 | 0.6 | 0.7 |
| Gm9795  | 0.2 | 0.2 | 0.6 | 1.3 | 0.7 | 1.1 | 1.6 | 0.5 |
| Gm9826  | 0.7 | 0.5 | 1.3 | 1.1 | 2.9 | 2.9 | 2.6 | 2.5 |
| Gpr176  | -   | -   | -   | -   | 3.5 | 4.5 | 4.7 | 4.7 |



|           |     |     |     |     |     |     |     |     |
|-----------|-----|-----|-----|-----|-----|-----|-----|-----|
| Gpt       | 2.2 | 1.8 | 1.4 | 1.2 | 1.3 | 1.5 | 2.0 | 1.3 |
| Gstcd     | 2.4 | 2.9 | 2.4 | 2.5 | 3.2 | 3.2 | 2.3 | 2.3 |
| Hacl1     | 3.9 | 3.8 | 3.4 | 3.2 | 3.1 | 3.5 | 3.6 | 3.4 |
| Hcn2      | 1.5 | 1.7 | -   | 0.2 | -   | 0.9 | 0.5 | 0.2 |
| Hist1h1b  | 0.6 | 0.5 | 1.6 | 1.7 | 1.7 | 0.3 | 1.1 | 0.5 |
| Hist1h2ad | 4.6 | 5.0 | 5.1 | 5.0 | 3.5 | 3.3 | 2.7 | 2.8 |
| Hist1h2ap | 6.9 | 7.3 | 7.5 | 7.3 | 7.7 | 7.2 | 6.6 | 6.8 |
| Hmgb1-ps1 | 1.6 | 1.7 | 2.2 | 1.0 | 1.7 | 1.7 | 0.5 | 1.0 |
| Hpd1      | 0.8 | 0.8 | 1.5 | 1.3 | 1.4 | 0.8 | -   | 0.4 |
| Itga7     | 1.3 | 1.2 | 1.3 | 1.6 | 3.2 | 3.2 | 2.9 | 2.8 |
| Katnb1    | 5.7 | 5.7 | 6.1 | 6.2 | 6.5 | 6.1 | 6.3 | 6.4 |
| Kazn      | 2.0 | 2.2 | 1.5 | 1.4 | 3.0 | 3.8 | 4.2 | 3.5 |
| Krt19     | 7.0 | 7.1 | 7.1 | 6.9 | 6.9 | 6.6 | 6.2 | 6.1 |
| Lama5     | 3.4 | 3.8 | 2.6 | 2.5 | 3.5 | 4.6 | 4.8 | 3.5 |
| Lims2     | 4.2 | 3.9 | 3.9 | 3.0 | 1.5 | 1.4 | 1.8 | 1.7 |
| Lppr2     | 2.4 | 2.5 | 1.9 | 1.7 | 1.9 | 2.4 | 2.6 | 2.1 |
| Lym4      | 3.1 | 3.4 | 2.2 | 2.7 | 3.4 | 3.7 | 3.5 | 3.4 |
| Lzts2     | 6.4 | 6.1 | 5.8 | 5.8 | 6.0 | 6.5 | 6.2 | 6.1 |
| Map9      | 0.4 | 1.3 | 0.1 | 0.4 | -   | -   | 0.7 | 0.3 |
| Mdm2      | 7.8 | 7.5 | 7.4 | 7.8 | 7.2 | 7.2 | 7.7 | 7.7 |
| Mettl23   | 3.3 | 3.4 | 3.0 | 2.8 | 3.1 | 3.5 | 3.4 | 3.2 |
| Mfsd2a    | -   | -   | 1.4 | 1.5 | 1.5 | 0.6 | 0.7 | 0.9 |
| Mir17hg   | 0.2 | 0.5 | 0.5 | 0.4 | -   | -   | 0.9 | 1.0 |
| Mme       | 2.8 | 2.6 | 2.2 | 3.0 | 1.9 | 1.9 | 3.0 | 2.7 |
| Mpv17l    | 1.7 | 1.5 | 2.1 | 2.3 | 2.1 | 1.5 | 2.0 | 1.6 |
| Mtfp1     | 1.4 | 1.3 | 1.3 | 1.2 | 0.4 | 0.4 | 0.0 | -   |
| Mum1l1    | 3.9 | 4.0 | 3.8 | 4.4 | 3.4 | 3.8 | 4.2 | 4.5 |
| Mzf1      | 0.9 | 0.9 | 0.1 | 0.3 | 0.3 | 0.3 | 0.3 | 0.1 |
| Nat14     | 1.6 | 1.3 | 1.4 | 1.1 | 2.1 | 2.0 | 1.4 | 1.1 |
| Neurl4    | 2.2 | 2.6 | 1.2 | 1.6 | 1.6 | 2.1 | 2.3 | 1.3 |
| Noxo1     | 1.8 | 1.2 | 0.7 | 0.8 | -   | 0.3 | 0.7 | 0.7 |
| Nqo1      | 7.2 | 7.2 | 7.8 | 7.5 | 8.9 | 8.4 | 8.2 | 8.7 |
| Nr1h4     | 3.8 | 3.4 | 3.8 | 3.2 | 3.1 | 3.4 | 3.9 | 3.8 |
| Nr4a2     | -   | 0.6 | 0.0 | 0.8 | 1.5 | -   | -   | 1.2 |
| Nrg1      | 1.3 | 1.5 | 1.6 | 1.1 | 2.2 | 2.0 | 2.6 | 2.5 |

|            |     |     |     |     |     |     |     |     |
|------------|-----|-----|-----|-----|-----|-----|-----|-----|
| Nudt17     | 1.6 | 1.8 | 1.8 | 1.2 | 2.9 | 2.9 | 2.1 | 2.2 |
| P2ry2      | 3.4 | 3.1 | 3.0 | 3.6 | 3.1 | 3.0 | 3.7 | 3.6 |
| Paqr7      | 3.6 | 3.9 | 3.0 | 3.0 | 3.3 | 3.9 | 3.4 | 3.5 |
| Pcdhgc5    | 1.2 | 1.6 | 0.2 | 0.0 | 0.5 | 1.1 | 0.9 | 1.3 |
| Pcsk4      | 2.3 | 1.6 | 2.6 | 2.2 | 3.1 | 2.8 | 2.3 | 2.2 |
| Phtf1os    | 1.6 | 1.5 | 0.4 | 0.2 | 0.6 | 0.9 | 1.1 | 1.0 |
| Plekha7    | 2.2 | 2.0 | 0.3 | 1.0 | 1.8 | 2.6 | 2.8 | 2.7 |
| Ppm1m      | 4.6 | 4.6 | 4.1 | 4.2 | 3.8 | 4.3 | 4.2 | 4.0 |
| Ppp1r10    | 5.0 | 4.9 | 4.4 | 4.9 | 4.4 | 4.6 | 5.7 | 5.6 |
| Prdm16     | 2.7 | 2.6 | 2.2 | 2.4 | 2.3 | 2.8 | 2.9 | 2.7 |
| Ptms       | 4.4 | 4.7 | 4.0 | 3.9 | 3.8 | 3.9 | 4.0 | 3.4 |
| Ralgds     | 1.0 | 1.1 | 0.2 | 0.3 | 1.5 | 2.0 | 2.3 | 2.3 |
| Rasa4      | 2.0 | 1.3 | 1.4 | 1.7 | 1.6 | 2.0 | 1.0 | 1.2 |
| Rbm12b1    | 2.6 | 2.4 | 2.3 | 2.8 | 2.6 | 2.6 | 3.0 | 3.1 |
| Rbm5       | 5.9 | 5.8 | 5.8 | 6.0 | 5.7 | 6.0 | 6.5 | 6.3 |
| Rgl1       | 0.6 | 0.1 | 0.7 | 0.1 | 1.1 | 0.8 | 0.3 | 0.5 |
| Ribc1      | 1.7 | 1.0 | 1.5 | 1.1 | 1.8 | 1.6 | 1.3 | 1.1 |
| Rnf130     | 3.4 | 3.3 | 2.6 | 2.1 | 3.7 | 4.6 | 4.5 | 4.2 |
| Rorc       | 2.0 | 1.7 | 0.9 | 1.1 | 1.4 | 1.9 | 2.3 | 1.2 |
| Rpgrip1l   | 1.4 | 2.2 | 1.5 | 2.0 | 0.1 | 1.1 | 2.2 | 2.0 |
| Rpl28-ps3  | 1.2 | 1.6 | 1.9 | 1.5 | 1.6 | 1.4 | 0.7 | 1.1 |
| Rpl31-ps10 | 0.9 | 1.2 | 1.3 | 0.5 | 1.7 | 1.5 | 0.9 | 1.0 |
| Rpl31-ps16 | 1.2 | 1.3 | 1.4 | 0.7 | 1.6 | 1.2 | 0.4 | 0.8 |
| Rragd      | 3.1 | 3.1 | 2.1 | 2.5 | 2.5 | 2.7 | 3.2 | 3.1 |
| Rsad2      | 8.6 | 7.8 | 7.8 | 8.4 | 7.3 | 7.0 | 7.8 | 8.0 |
| Rsb1       | 3.3 | 3.1 | 3.6 | 3.9 | 3.7 | 3.7 | 4.0 | 3.4 |
| Sass6      | 3.4 | 3.0 | 3.1 | 3.6 | 2.2 | 2.5 | 3.2 | 3.0 |
| Scn1b      | 1.7 | 1.5 | 0.2 | 0.1 | 0.7 | 1.1 | 0.5 | 1.0 |
| Sco2       | 2.6 | 2.7 | 3.5 | 3.2 | 3.1 | 2.5 | 2.9 | 2.9 |
| Sdsl       | 2.5 | 2.6 | 1.9 | 1.7 | 0.5 | 0.4 | 0.8 | 0.0 |
| Sema3b     | 3.6 | 3.5 | 2.9 | 2.6 | 1.0 | 2.0 | 2.3 | 1.3 |
| Serpina3g  | 0.5 | 0.0 | 1.8 | 1.6 | 5.0 | 5.3 | 5.7 | 4.9 |
| Serpina3n  | 1.8 | 1.6 | 1.0 | 0.7 | 4.7 | 4.9 | 5.2 | 4.6 |
| Slc25a42   | 4.4 | 4.0 | 3.3 | 3.5 | 3.2 | 3.4 | 3.5 | 3.1 |
| Slc37a4    | 4.1 | 3.5 | 3.8 | 3.5 | 4.4 | 4.1 | 3.5 | 3.5 |
| Slc41a3    | 4.3 | 4.1 | 3.9 | 3.7 | 3.4 | 3.3 | 3.5 | 3.3 |
| Slc44a3    | 0.0 | 0.5 | 1.6 | 1.2 | 2.9 | 2.5 | 2.5 | 2.5 |
| Smim19     | 5.6 | 5.7 | 4.9 | 5.0 | 4.9 | 5.1 | 5.0 | 4.9 |

|         |     |     |     |     |     |     |     |     |
|---------|-----|-----|-----|-----|-----|-----|-----|-----|
| Snai2   | 5.9 | 5.8 | 6.3 | 6.5 | 6.3 | 6.1 | 6.2 | 6.0 |
| Snhg17  | 4.0 | 4.1 | 5.1 | 4.6 | 5.0 | 4.0 | 5.0 | 4.2 |
| Sord    | 5.1 | 4.7 | 4.2 | 4.3 | 5.1 | 4.9 | 5.0 | 5.0 |
|         | -   | -   | -   | -   | -   | -   | -   | -   |
| Speer3  | 1.2 | 2.0 | 0.2 | 0.1 | 0.7 | 1.3 | 1.1 | 1.4 |
| St3gal3 | 2.2 | 2.4 | 2.0 | 1.7 | 2.0 | 2.3 | 2.0 | 2.1 |
| Syt12   | 3.4 | 3.6 | 3.7 | 3.6 | 2.5 | 2.5 | 2.0 | 2.1 |
| Syt11   | 3.2 | 3.2 | 2.5 | 2.0 | 2.6 | 3.0 | 2.9 | 2.7 |
| Tab1    | 4.9 | 4.3 | 4.6 | 4.7 | 4.7 | 4.8 | 4.3 | 4.0 |
| Taf1c   | 3.7 | 3.8 | 3.8 | 3.9 | 3.6 | 3.6 | 4.0 | 4.1 |
| Taf5    | 4.4 | 4.0 | 4.1 | 4.4 | 4.3 | 4.1 | 3.8 | 3.9 |
|         |     |     |     |     |     |     |     |     |
| Tec     | 0.0 | 0.3 | 0.7 | 0.8 | 1.2 | 1.8 | 1.5 | 2.0 |
| Tmem121 | 3.6 | 3.4 | 3.6 | 2.9 | 4.3 | 3.9 | 3.1 | 3.3 |
| Tmem170 | 1.0 | 0.8 | 0.4 | 1.0 | 0.5 | 0.3 | 1.5 | 1.2 |
| Tmem25  | 1.0 | 0.3 | 0.4 | 0.1 | 0.2 | 0.9 | 1.9 | 1.7 |
| Tmem86a | 1.3 | 1.3 | 0.4 | 0.4 | 0.8 | 0.3 | 0.2 | 0.8 |
| Tnip1   | 5.2 | 4.9 | 4.4 | 4.7 | 4.5 | 4.9 | 5.1 | 4.5 |
| Tprn    | 4.2 | 3.6 | 4.0 | 3.7 | 4.1 | 3.9 | 3.5 | 3.5 |
| Trim12a | 5.1 | 4.9 | 5.0 | 5.1 | 4.3 | 4.5 | 4.8 | 4.9 |
|         |     |     |     |     |     |     |     |     |
|         | -   | -   | -   | -   | -   | -   | -   | -   |
| Trim34b | 1.4 | 1.3 | 1.1 | 0.6 | 2.0 | 2.1 | 1.7 | 1.8 |
| Trim56  | 3.3 | 4.0 | 3.3 | 4.0 | 2.8 | 2.6 | 3.7 | 3.3 |
|         |     |     |     |     |     |     |     |     |
|         |     |     |     |     | -   | -   | -   | -   |
| Trim7   | 1.5 | 1.6 | 0.9 | 0.9 | 0.1 | 0.6 | 0.6 | 0.6 |
|         |     |     |     |     |     |     |     |     |
|         |     |     |     |     | -   | -   | -   | -   |
| Ttc12   | 0.0 | 0.6 | 0.3 | 0.0 | 0.5 | 0.1 | 0.6 | 0.7 |
| Ttpa    | 1.7 | 1.7 | 2.3 | 2.2 | 0.3 | 0.8 | 0.8 | 0.4 |
| Tuft1   | 6.6 | 6.8 | 6.8 | 6.6 | 5.7 | 5.9 | 6.2 | 6.3 |
| Ube2e2  | 6.0 | 5.9 | 5.4 | 5.2 | 4.9 | 5.4 | 5.1 | 5.1 |
| Usp2    | 1.7 | 2.2 | 2.3 | 2.0 | 1.7 | 1.5 | 3.5 | 2.8 |
| Vsig10l | 0.8 | 0.8 | 0.6 | 0.4 | 1.1 | 1.3 | 1.8 | 1.5 |
| Wars2   | 3.9 | 3.9 | 4.3 | 4.4 | 4.3 | 4.2 | 4.1 | 4.1 |
| Wsb2    | 8.0 | 8.1 | 7.8 | 7.7 | 6.8 | 7.3 | 7.4 | 7.6 |
|         |     |     |     |     |     |     |     |     |
|         |     |     |     |     | -   | -   | -   | -   |
| Ypel2   | 0.6 | 0.3 | 0.8 | 0.9 | 0.9 | 0.9 | 1.6 | 0.5 |
|         |     |     |     |     |     |     |     |     |
|         |     |     |     |     | -   | -   | -   | -   |
| Zcwpw1  | 1.5 | 1.1 | 0.3 | 0.4 | 0.6 | 0.6 | 0.8 | 0.8 |
| Zfp362  | 2.9 | 3.2 | 2.0 | 1.9 | 1.5 | 3.0 | 2.3 | 2.1 |
| Zfp472  | 3.1 | 3.2 | 3.7 | 3.6 | 3.0 | 3.3 | 3.3 | 3.1 |
| Zfp566  | 3.5 | 3.2 | 3.9 | 3.7 | 3.9 | 3.5 | 3.8 | 3.7 |
| Zfp763  | 3.1 | 3.0 | 2.4 | 3.3 | 2.9 | 3.3 | 2.2 | 2.1 |
| Zfp772  | 3.2 | 3.0 | 3.0 | 3.3 | 3.1 | 2.8 | 2.6 | 2.4 |

|        |     |     |     |     |     |     |     |     |
|--------|-----|-----|-----|-----|-----|-----|-----|-----|
| Zfp775 | 4.1 | 3.7 | 3.9 | 3.7 | 4.1 | 4.0 | 3.7 | 3.3 |
| Zfp81  | 2.9 | 2.8 | 3.6 | 3.6 | 4.0 | 3.2 | 3.4 | 3.4 |
